# Supplementary material for: Comparative ozone production sensitivity to NO x and VOCs in Quito, Ecuador and Santiago, Chile: implications for control strategies in times of climate action
Source: Copernicus journal article supplement (doi:10.5194/egusphere-2024-3720), 2024-12-19
Supplement: Supplementary file 1 [file egusphere-2024-3720-supplement.pdf]

*Supplement of*

**Comparative ozone production sensitivity to NO<sub>x</sub> and VOCs in Quito, Ecuador and Santiago, Chile: implications for control strategies in times of climate action**

**María Cazorla et al.**

*Correspondence to:* María Cazorla (mcazorla@usfq.edu.ec)

## List of contents

**Figure S1:** Time series of solar radiation at Quito and Santiago overlapping sunny days to all days.

**Figure S2:** Air quality time series for Santiago (O'Higgins Station)

**Figure S3:** Air quality time series for Quito. CO was obtained by averaging data from three nearby air quality stations, Belisario, Centro and Tumbaco, this data can be accessed in the link: <https://aireambiente.quito.gob.ec/>

**Figure S4:** Isoprene and NOx scenarios for Quito and Santiago.

**Table S1:** VOC compounds used in the model with the measurement nomenclature and the attributed weighting factors

**Table S2:** F0Am input options chosen for model runs

**Table S3:** Ozone and NO statistics for 2022 data at Quito and Santiago

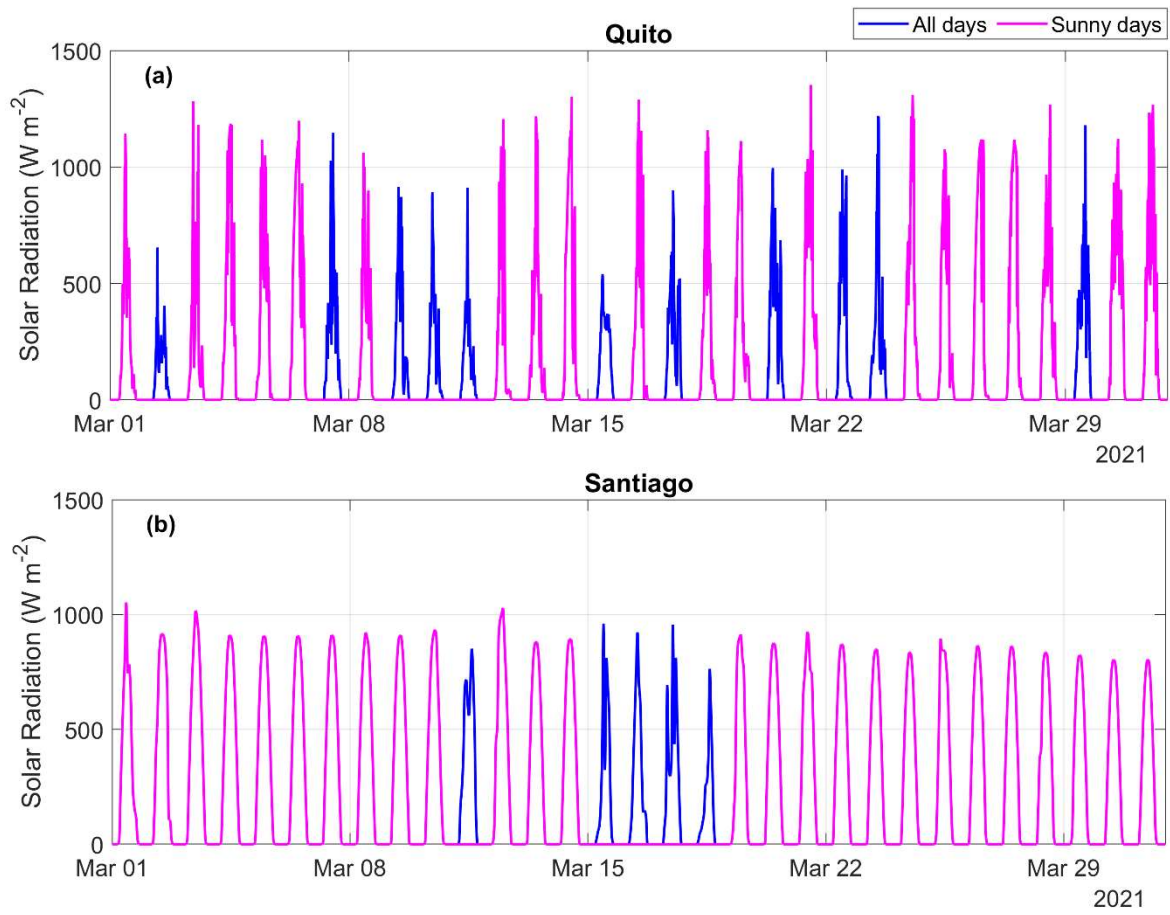

Figure S1: Time series of solar radiation in Quito and Santiago overlapping sunny days to all days.

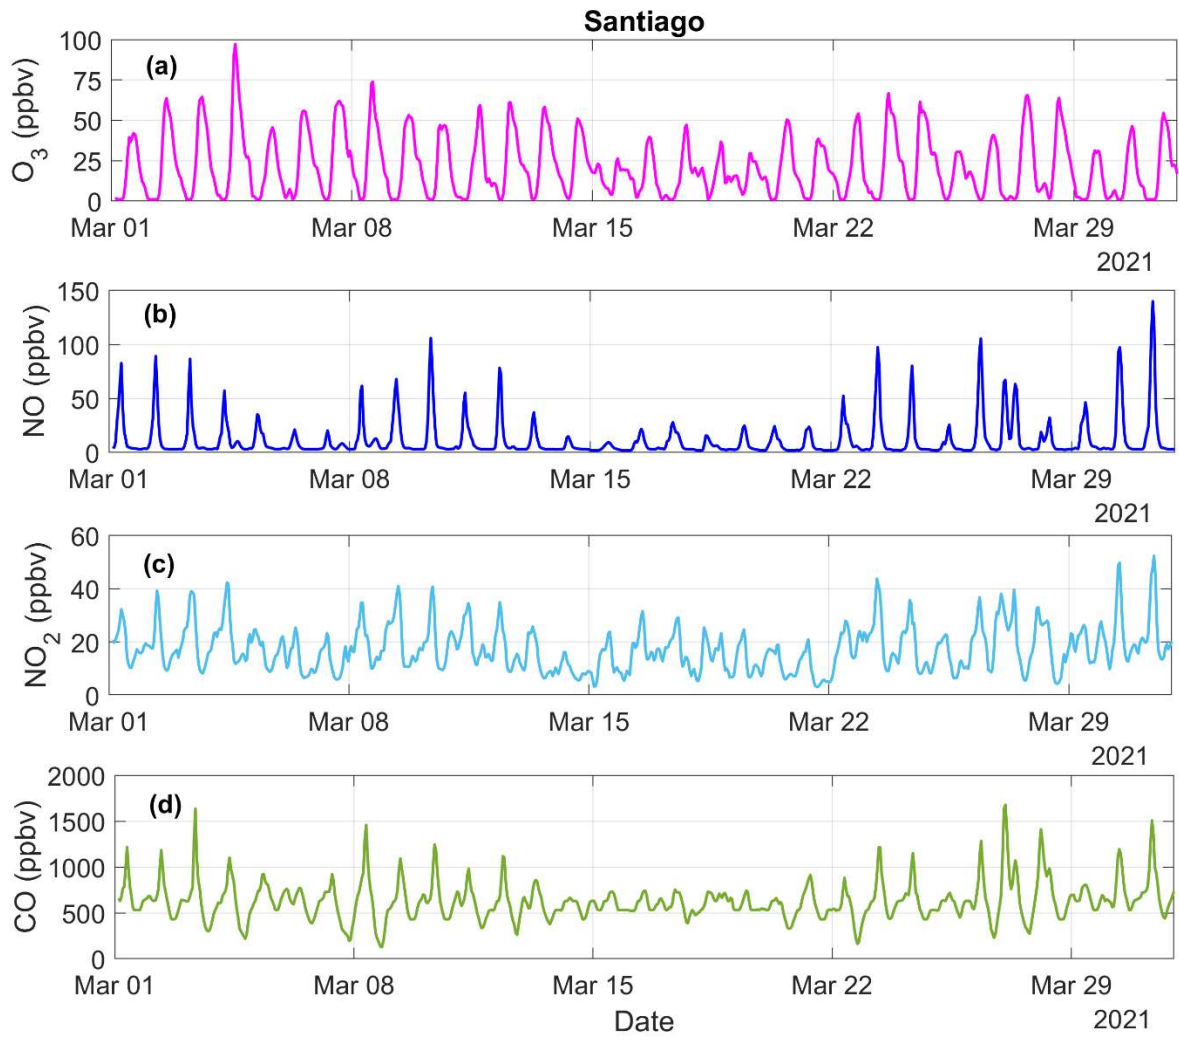

**Figure S2: Air quality time series for Santiago (O'Higgins Station)**

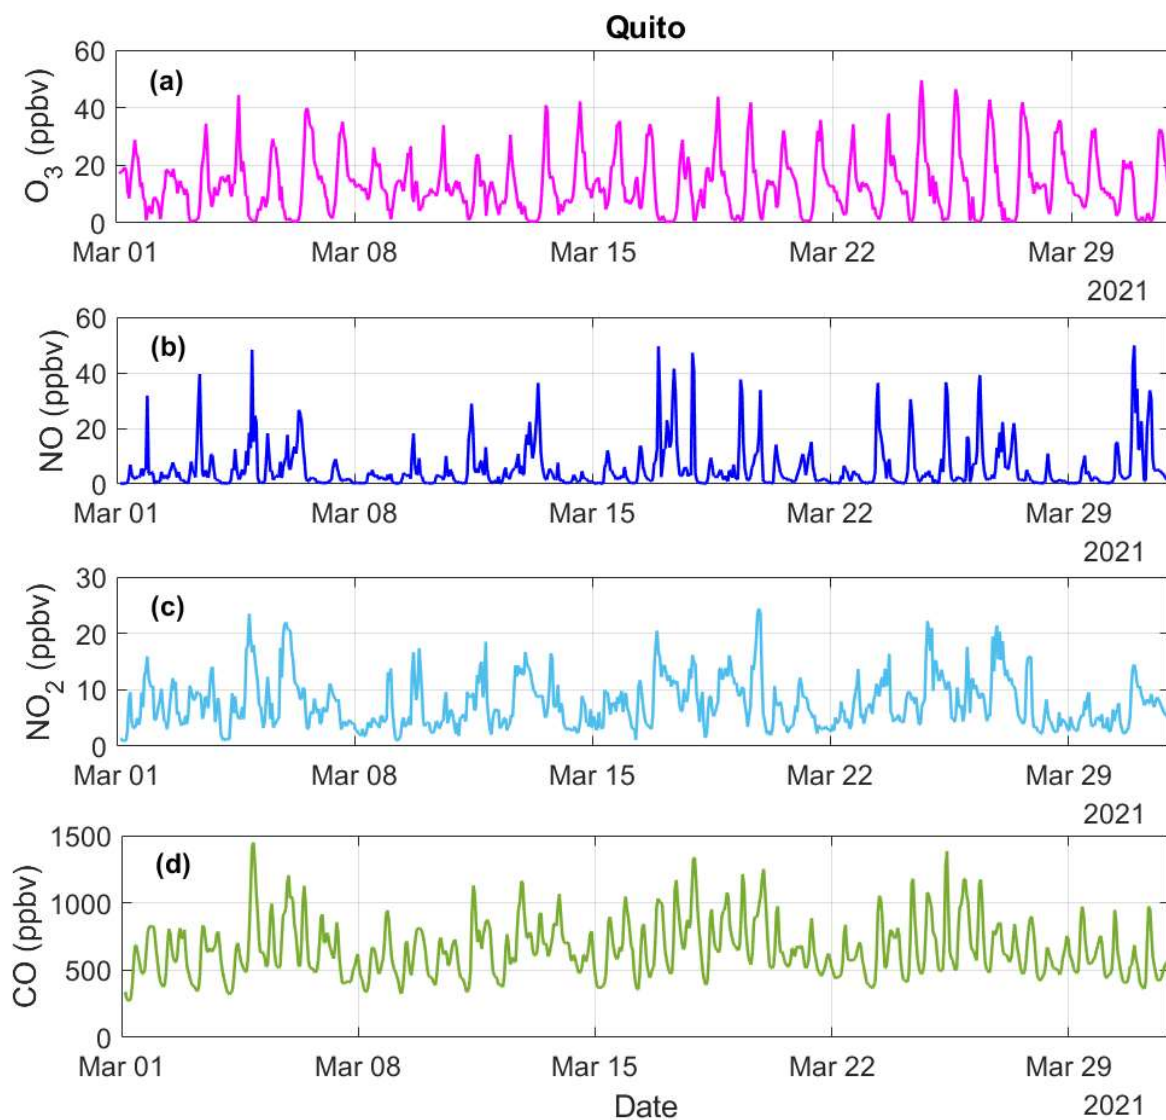

Figure S3. Air quality time series for Quito. Ozone, NO, and NO<sub>2</sub> are from EMA USFQ station. CO was obtained by averaging data from Belisario, Centro and Tumbaco stations from the Quito Air Quality Network (Secretariat of the Environment, Quito, Ecuador, <https://aireambiente.quito.gob.ec/>).

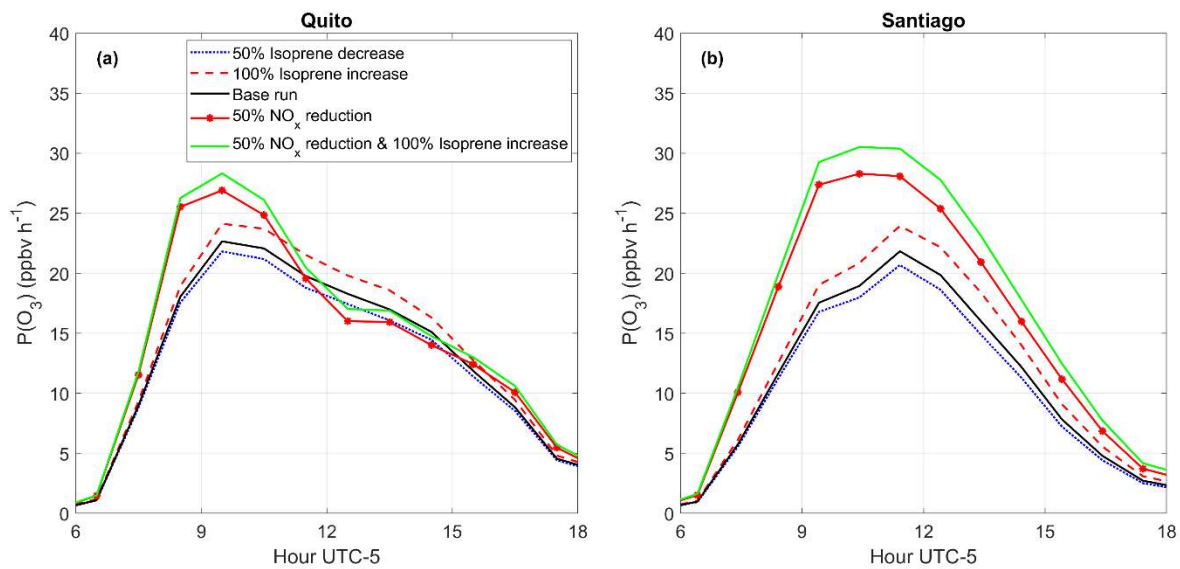

Figure S4. Isoprene and NO<sub>x</sub> scenarios for Quito and Santiago.

Table S1: VOC compounds used in the model with the measurement nomenclature and the attributed weighting factors

| Group                 | Measured Compounds           | MCM Nomenclature | Name                   | Attributed Factor |
|-----------------------|------------------------------|------------------|------------------------|-------------------|
|                       |                              | CO               | Carbon monoxide        | 1                 |
|                       |                              | O3               | Ozone                  | 1                 |
|                       |                              | NO               | Nitrogen monoxide      | 1                 |
|                       |                              | NO2              | Nitrogen dioxide       | 1                 |
| Alkenes               | Propene/Cyclopropane         | C3H6             | Propene                | 1                 |
|                       | 1- Butene/2-Butene           | BUT1ENE          | 1-butene               | 0.333             |
|                       |                              | CBUT2ENE         | Cis-2-butene           | 0.333             |
|                       |                              | TBUT2ENE         | Trans-2-butene         | 0.333             |
| Aromatics             | Benzene                      | BENZENE          | Benzene                | 1                 |
|                       | Toluene                      | TOLUENE          | Toluene                | 1                 |
|                       | Styrene                      | STYRENE          | Styrene                | 1                 |
|                       | Ethyl benzene/Xylenes        | EBENZ            | Ethylbenzene           | 0.20              |
|                       |                              | OXYL             | O-xylene               | 0.20              |
|                       |                              | MXYL             | M-xylene               | 0.40              |
|                       |                              | PXYL             | P-xylene               | 0.20              |
|                       | C9-Aromatics                 | PBENZ            | Propylbenzene          | 0.125             |
|                       |                              | IPBENZ           | Cumene                 | 0.125             |
|                       |                              | TM123B           | 1,2,3-trimethylbenzene | 0.125             |
|                       |                              | TM124B           | 1,2,4-trimethylbenzene | 0.125             |
|                       |                              | TM135B           | 1,3,5-trimethylbenzene | 0.125             |
|                       |                              | OETHTOL          | 2-ethyltoluene         | 0.125             |
| METHTOL               |                              | 3-ethyltoluene   | 0.125                  |                   |
| PETHTOL               |                              | 4-ethyltoluene   | 0.125                  |                   |
| Aldehydes and ketones | Formaldehyde                 | HCHO             | Formaldehyde           | 1                 |
|                       | Acetaldehyde                 | CH3CHO           | Acetaldehyde           | 1                 |
|                       | Methacrolein / MVK           | MACR             | Methacrolein           | 1                 |
|                       | Butanone / Butanal           | MEK              | Butanone               | 0.50              |
|                       |                              | C3H7CHO          | Butanal                | 0.50              |
|                       | Acetone / Propanal           | CH3COCH3         | Acetone                | 0.50              |
|                       |                              | C2H5CHO          | Propanal               | 0.50              |
| Oxygenated compounds  | Acetic Acid / Glicolaldehyde | CH3CO2H          | Acetic acid            | 1                 |
|                       | Methanol                     | CH3OH            | Methanol               | 1                 |

|              |              |          |              |       |
|--------------|--------------|----------|--------------|-------|
|              | Ethanol      | C2H5OH   | Ethanol      | 1     |
|              | Phenol       | PHENOL   | Phenol       | 1     |
|              | Cresol       | CRESOL   | Cresol       | 1     |
| Isoprene     | Isoprene     | C5H8     | Isoprene     | 1     |
| Monoterpenes | Monoterpenes | APINENE  | Alpha-pinene | 0.333 |
|              |              | BPINENE  | Beta-pinene  | 0.333 |
|              |              | LIMONENE | Limonene     | 0.333 |



**Table S2: F0Am input options chosen for model runs**

| Parameter               | Variables                                           | Name in model           | Units           | Input                                                           |
|-------------------------|-----------------------------------------------------|-------------------------|-----------------|-----------------------------------------------------------------|
| Meteorology             | Pressure                                            | P                       | mbar            | Meteorological dataset                                          |
|                         | Temperature                                         | T                       | K               |                                                                 |
|                         | Relative humidity                                   | RH                      | %               |                                                                 |
| Dilution                | Dilution constant                                   | kdil                    | s <sup>-1</sup> | 1/86400                                                         |
| Photolysis options      | J-value function                                    | MCMv331_J(Met, Jmethod) | s <sup>-1</sup> | MCMv331_J(Met,0)                                                |
| Radiation-Related       | Solar zenith angle                                  | SZA                     | degrees         | Self-generated                                                  |
|                         | Ozone column                                        | O3col                   | DU              | Merra-2 1 hour dataset of Area-Averaged of total ozone column   |
|                         | Albedo                                              | Albedo                  | -               | Merra-2 1 hour dataset of Area-Averaged of surface albedo       |
|                         | Altitude                                            | ALT                     | m               | 538.4 (S), 2414(Q)                                              |
| Chemical Concentrations | O <sub>3</sub> , NO, NO <sub>2</sub> , CO and VOC's | InitConc                | ppb             | Dataset of air quality variables and 35 VOC's                   |
|                         | Background concentration                            | BkgdConc                | ppb             | 0 (default)                                                     |
| Chemistry               | MCM scheme                                          | ChemFiles               | -               | Subset of chemical species                                      |
| Model options           | Verbose                                             | Verbose                 | -               | 3 (flag for verbose command window output)                      |
|                         | End points                                          | EndPointsOnly           | -               | 1 (flag for concentration and rate outputs)                     |
|                         | Link step                                           | LinkSteps               | -               | 0 (flag for using end-points of one run to initialize next run) |

**Table S3: Ozone and NO statistics for 2022 data at Quito and Santiago**

| Month 2022 | Days | Quito                                        |                                   | Santiago                                     |                                   |
|------------|------|----------------------------------------------|-----------------------------------|----------------------------------------------|-----------------------------------|
|            |      | Days with O <sub>3</sub> higher than 60 ppbv | Days with NO higher than 100 ppbv | Days with O <sub>3</sub> higher than 60 ppbv | Days with NO higher than 100 ppbv |
| January    | 31   | 0                                            | 5                                 | 2                                            | 1                                 |
| February   | 28   | 1                                            | 1                                 | 6                                            | 0                                 |
| March      | 31   | 0                                            | 0                                 | 7                                            | 12                                |
| April      | 30   | 0                                            | 0                                 | 5                                            | 17                                |
| May        | 31   | 0                                            | 0                                 | 1                                            | 27                                |
| June       | 30   | 0                                            | 1                                 | 0                                            | 25                                |
| July       | 31   | 0                                            | 0                                 | 0                                            | 24                                |
| August     | 31   | 0                                            | 0                                 | 2                                            | 22                                |
| September  | 30   | 0                                            | 0                                 | 2                                            | 13                                |
| October    | 31   | 0                                            | 4                                 | 4                                            | 6                                 |
| November   | 30   | 0                                            | 10                                | 6                                            | 1                                 |
| December   | 31   | 0                                            | 10                                | 13                                           | 0                                 |
| Sum        | 365  | 1                                            | 31                                | 48                                           | 148                               |
